# Supplementary material for: Ce-modified Co–Mn oxide spinel on reduced graphene oxide and carbon black as ethanol tolerant oxygen reduction electrocatalyst in alkaline media
Source: Royal Society of Chemistry journal article supplement (doi:10.1039/d2ra06806k), 2022-01-01
Supplement: d2ra06806k1.pdf [file d2ra06806k1.pdf]

## SUPPLEMENTARY MATERIAL

### **Ce-modified Co-Mn oxide spinel on reduced graphene oxide and carbon black as ethanol tolerant oxygen reduction electrocatalyst in alkaline media**

*Sigrid Wolf<sup>1,\*</sup>, Michaela Roschger<sup>1</sup>, Boštjan Genorio<sup>2</sup>, Daniel Garstenauer<sup>1</sup>, Josip Radić<sup>3</sup>, Viktor Hacker<sup>1</sup>*

*<sup>1</sup> Institute of Chemical Engineering and Environmental Technology, Graz University of Technology, Inffeldgasse 25/C, 8010 Graz, Austria*

*<sup>2</sup> Faculty of Chemistry and Chemical Technology, University of Ljubljana, Večna pot 113, SI-1000 Ljubljana, Slovenia*

*<sup>3</sup> Department of Environmental Chemistry, Faculty of Chemistry and Technology, University of Split, R. Boškovića 35, 21000 Split, Croatia*

**\* Corresponding author:**

Sigrid Wolf

Graz University of Technology, Institute of Chemical Engineering and Environmental Technology

Inffeldgasse 25/C, AUT-8010 Graz

E-mail: [sigrid.wolf@tugraz.at](mailto:sigrid.wolf@tugraz.at)

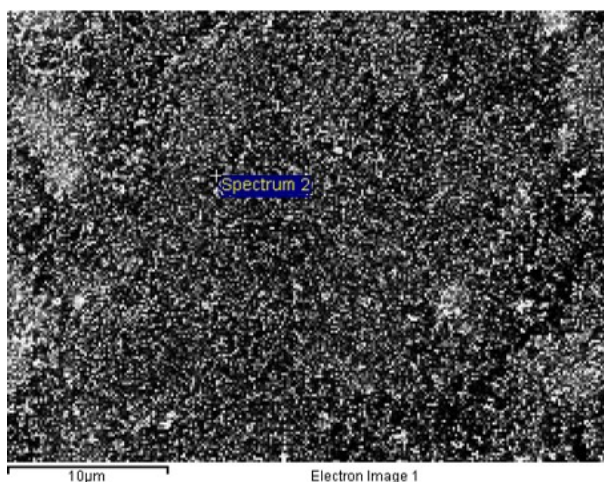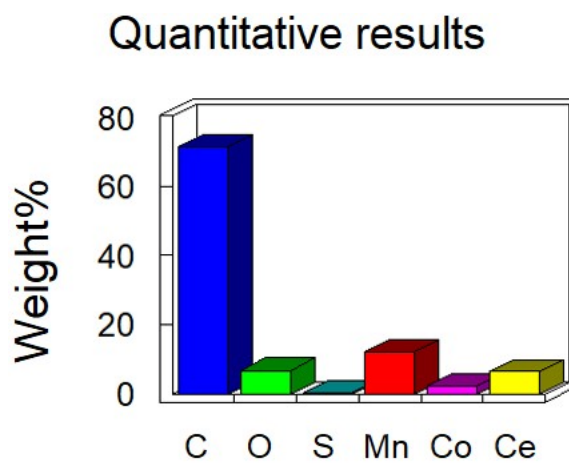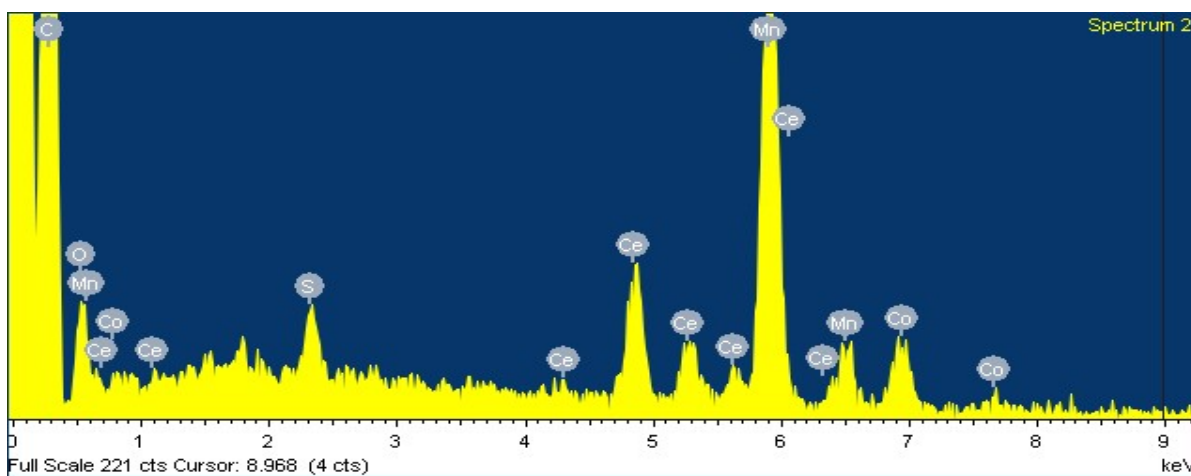

Fig. S1 EDX results of Ce-CMO/VC.

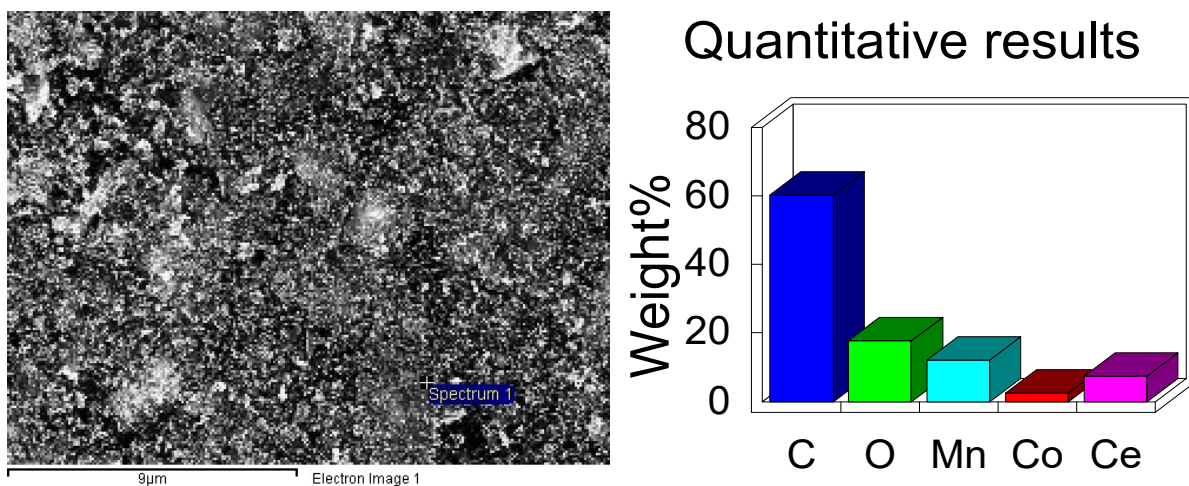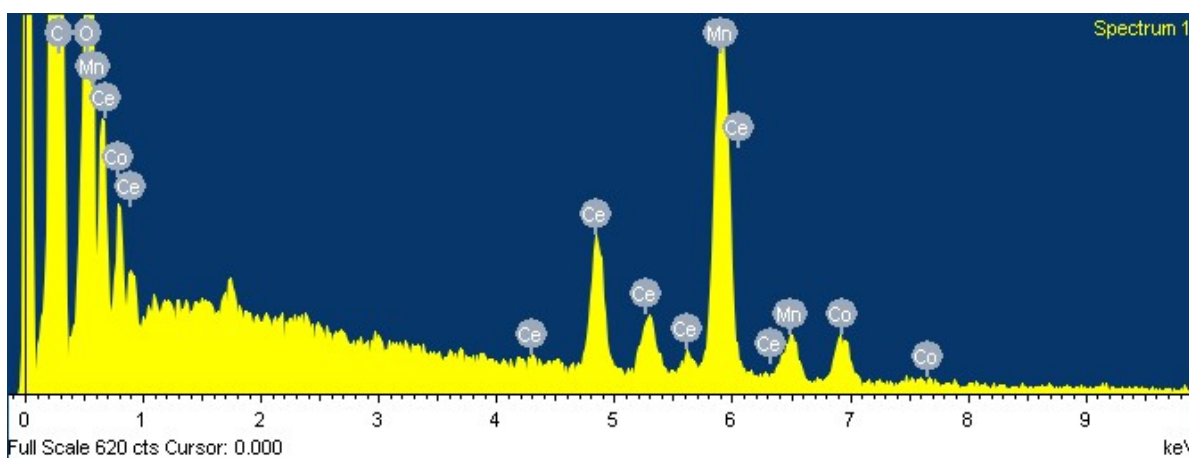

**Fig. S2** EDX results of Ce-CMO/rGO-VC.

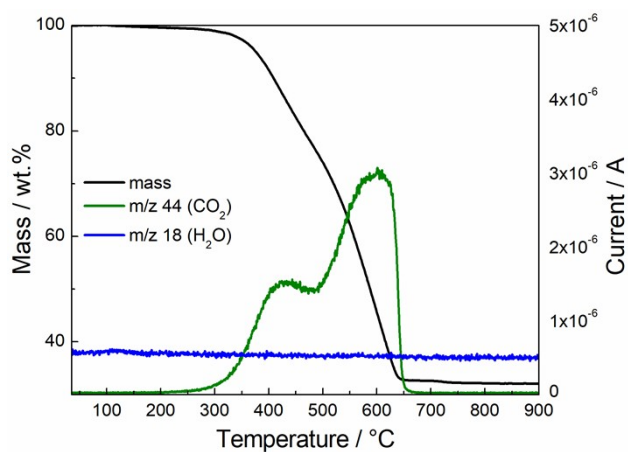

**Fig. S3** Thermogravimetric behavior and mass spectrometry results of CMO/VC in O<sub>2</sub>/Ar atmosphere.

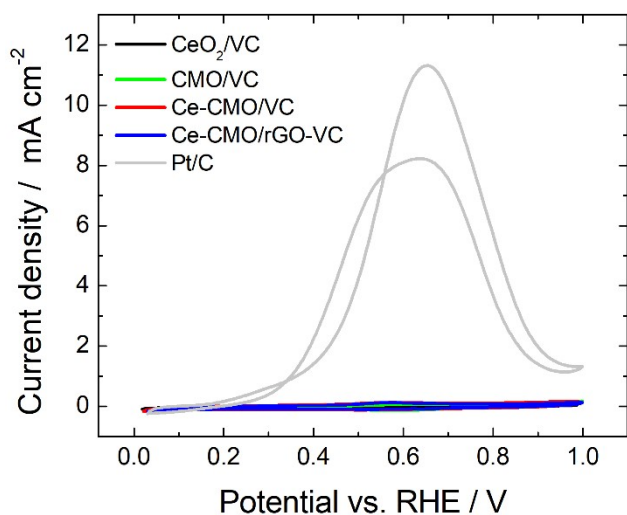

**Fig. S4** CVs of Ce-CMO/VC, Ce-CMO/rGO-VC, CeO<sub>2</sub>/VC, CMO/VC and Pt/C catalysts at 10 mV s<sup>-1</sup> in de-aerated 1 M KOH/1 M EtOH.

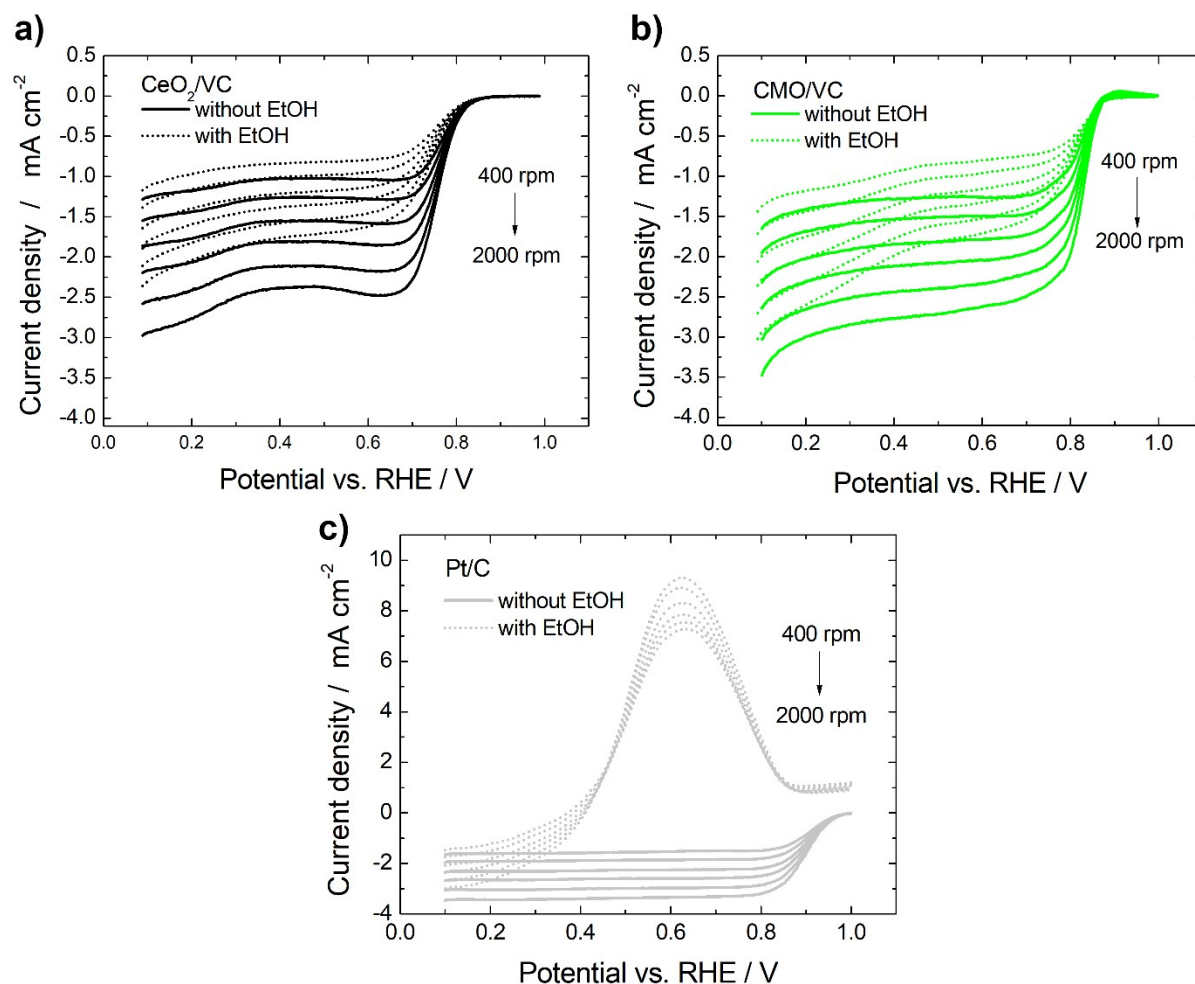

**Fig. S5.** Potentiodynamic ORR curves of CeO<sub>2</sub>/VC (a), CMO/VC (b) and comm. Pt/C (c) in O<sub>2</sub>-saturated 1 M KOH or 1 M KOH/1 M EtOH at 10 mV s<sup>-1</sup> at different rotation rates.

**Table S1.** Comparison of Ce-CMO/C with other catalysts combining cerium, manganese and cobalt oxides.

| Material                                                                        | $c_{\text{KOH}}/M$ | $E_{1/2}/V_{\text{Reference}}$    | $j_D/\text{mA cm}^{-2}$ | $n/$ | Tafel slope/ $\text{mV dec}^{-1}$ | Reference |
|---------------------------------------------------------------------------------|--------------------|-----------------------------------|-------------------------|------|-----------------------------------|-----------|
| Ce@Co <sub>3</sub> O <sub>4</sub> /CNFs                                         | 0.1                | 0.810 $V_{\text{RHE}}$            | -5.03                   | ~4   | 85.8                              | 1         |
| Co <sub>3</sub> O <sub>4</sub> -CeO <sub>2</sub> /C                             | 0.1                | ~0.83 $V_{\text{RHE}}$            | approx. -5.35           | 3.91 | 83.9                              | 2         |
| Co <sub>3</sub> O <sub>4</sub> @Z67-NT@CeO <sub>2</sub>                         | 0.1                | 0.88 $V_{\text{RHE}}$             | approx. -6.8            | ~4   | 66.8                              | 3         |
| MnOOH@CeO <sub>2</sub>                                                          | 0.1                | 0.80 $V_{\text{RHE}}$             | -5.08                   | 3.95 | 111.1                             | 4         |
| CoO <sub>x</sub> /CeO <sub>2</sub> /RGO                                         | 0.1                | 0.83 $V_{\text{RHE}}$             | approx. -5.0            | 3.8  | 54                                | 5         |
| MnO <sub>x</sub> -CeO <sub>2</sub> /KB                                          | 0.1                | 0.81 $V_{\text{RHE}}$             | approx. -5.0            | ~4   | 94.4                              | 6         |
| 4.8% Ce-MnO <sub>2</sub> /C                                                     | 0.1                | 0.783 $V_{\text{RHE}}$            | approx. -5.6            | 3.97 | 90                                | 7         |
| 0.5% Ce-Co <sub>3</sub> O <sub>4</sub>                                          | 0.1                | 0.665 $V_{\text{RHE}}$            | approx. -5.5            | ~4   | 108 and 60                        | 8         |
| CeOMS-2                                                                         | 1.0                | ~0.05 $V_{\text{Hg/HgO}}$         | approx. -0.6**          | 3.4  | -                                 | 9         |
| CeO <sub>2</sub> /MnWO <sub>4</sub> -2                                          | 0.1                | 0.827 $V_{\text{RHE}}$            | -4.2                    | 3.1  | -                                 | 10        |
| 5% Ce-MnO <sub>x</sub> /Ag                                                      | 0.1                | ~0.88 $V_{\text{RHE}}$            | approx. -5.4            | 3.98 | 50                                | 11        |
| CeO <sub>2</sub> -CoO <sub>x</sub> /N-rGO                                       | -                  | approx. -0.1 $V_{\text{Ag/AgCl}}$ | approx. -6.5            | 4.2  | -                                 | 12        |
| Co-CeO <sub>2</sub> /N-CNR                                                      | 0.1                | 0.819 $V_{\text{RHE}}^*$          | approx. -6.7            | 3.95 | 58.4                              | 13        |
| 5% Mn-CeO <sub>2</sub> /rGO                                                     | 0.1                | -0.336 $V_{\text{Ag/AgCl}}$       | -4.83                   | 3.6  | -                                 | 14        |
| $\alpha$ -MnO <sub>2</sub> /Mn <sub>3</sub> O <sub>4</sub> /CeO <sub>2</sub> /C | 0.1                | -0.24 $V_{\text{Ag/AgCl}}$        | -6.63                   | ~4   | 921.9                             | 15        |
| Ce-CMO-18%/MWCNTs                                                               | 0.1                | 0.84 $V_{\text{RHE}}^*$           | approx. -6.6            | ~4   | 84                                | 16        |
| Ce-CMO/VC                                                                       | 1.0                | 0.828 $V_{\text{RHE}}$            | -2.84                   | 3.27 | 57.2                              | This work |
| Ce-CMO/rGO-VC                                                                   | 1.0                | 0.822 $V_{\text{RHE}}$            | -2.93                   | 3.48 | 61.0                              | This work |

$c_{\text{KOH}}$  = KOH electrolyte concentration;  $E_{1/2}$  = half-wave potential;  $j_D$  = diffusion limited current density;  $n$  = electron transfer number; \* potential at 3 mA cm<sup>-2</sup> is given instead of  $E_{1/2}$ ; \*\*  $j_D$  is given in mA instead of mA cm<sup>-2</sup>.

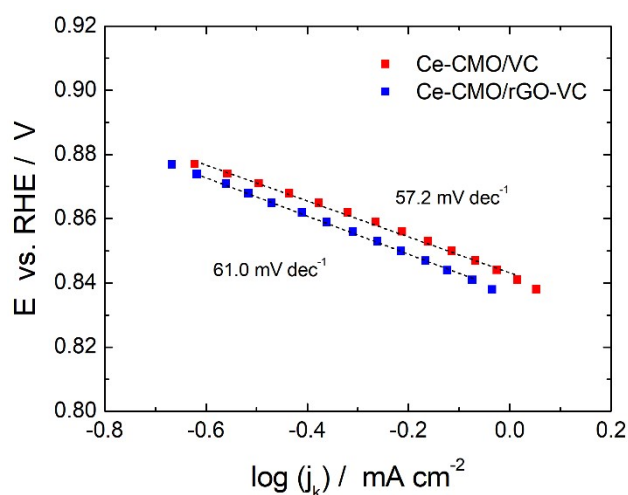

**Fig. S6.** Tafel plot of Ce-CMO/VC and Ce-CMO/rGO-VC.

**Table S2.** Limiting current density of the Ce-CMO/VC and Ce-CMO/rGO-VC catalysts, CMO/VC and CeO<sub>2</sub>/VC without/with EtOH at different rpm.

| Catalysts            | 400 rpm/<br>mA cm <sup>-2</sup> | 600 rpm/<br>mA cm <sup>-2</sup> | 900 rpm/<br>mA cm <sup>-2</sup> | 1200 rpm/<br>mA cm <sup>-2</sup> | 1600 rpm/<br>mA cm <sup>-2</sup> | 2000 rpm/<br>mA cm <sup>-2</sup> |
|----------------------|---------------------------------|---------------------------------|---------------------------------|----------------------------------|----------------------------------|----------------------------------|
| CeO <sub>2</sub> /VC | -1.03/-0.84                     | -1.26/-1.01                     | -1.55/-1.21                     | -1.81/-1.38                      | -2.12/-1.58                      | -2.39/-1.76                      |
| CMO/VC               | -1.29/-0.95                     | -1.54/-1.13                     | -1.85/-1.36                     | -2.12/-1.55                      | -2.44/-1.78                      | -2.77/-1.99                      |
| Ce-CMO/VC            | -1.45/-1.30                     | -1.75/-1.53                     | -2.13/-1.80                     | -2.46/-2.03                      | -2.84/-2.28                      | -3.22/-2.58                      |
| Ce-CMO/rGO-VC        | -1.52/-1.32                     | -1.82/-1.57                     | -2.20/-1.87                     | -2.52/-2.14                      | -2.93/-2.46                      | -3.30/-2.80                      |

## References

- 1 X. Sun, T. Xu, W. Sun, J. Bai and C. Li, *J. Alloys Compd.*, 2022, **898**, 162778.
- 2 K. Liu, X. Huang, H. Wang, F. Li, Y. Tang, J. Li and M. Shao, *ACS Appl. Mater. Interfaces*, 2016, **8**, 34422–34430.
- 3 X. Li, S. You, J. Du, Y. Dai, H. Chen, Z. Cai, N. Ren and J. Zou, *J. Mater. Chem. A*, 2019, **7**, 25853–25864.
- 4 D. Liu, J. Tian, Y. Tang, J. Li, S. Wu, S. Yi, X. Huang, D. Sun and H. Wang, *Chem. Eng. J.*, 2021, **406**, 126772.
- 5 H. Zhong, L. Alberto Estudillo-Wong, Y. Gao, Y. Feng and N. Alonso-Vante, *J. Energy Chem.*, 2021, **59**, 615–625.
- 6 J. Chen, N. Zhou, H. Wang, Z. Peng, H. Li, Y. Tang and K. Liu, *Chem. Commun.*, 2015, **51**, 10123–10126.
- 7 S. Sun, Y. Xue, Q. Wang, H. Huang, H. Miao and Z. Liu, *Electrochim. Acta*, 2018, **263**, 544–554.
- 8 L. Wang, Q. Liu, N. Ta, H. Fan and E. Wang, *ChemistrySelect*, 2021, **6**, 3512–3518.
- 9 N. Vilas Bôas, J. B. Souza Junior, L. C. Varanda, S. A. S. Machado and M. L. Calegari, *Appl. Catal. B Environ.*, 2019, **258**, 118014.
- 10 M. Sridharan and T. Maiyalagan, *J. Mater. Sci. Mater. Electron.*, 2022, **33**, 9538–9548.
- 11 W. Wang, J. Q. Chen, Y. R. Tao, S. N. Zhu, Y. X. Zhang and X. C. Wu, *ACS Catal.*, 2019, **9**, 3498–3510.
- 12 B. Ge, T. Yue, J. Liu, X. Wu, B. Chen, Y. Li and Z. Yang, *Mater. Res. Express*, 2021, **8**, 035510.
- 13 A. Sivanantham, P. Ganesan and S. Shanmugam, *Appl. Catal. B Environ.*, 2018, **237**, 1148–1159.
- 14 I. Hota, S. Soren, B. D. Mohapatra, A. K. Debnath, K. P. Muthe, K. S. K. Varadwaj and P. Parhi, *J. Electroanal. Chem.*, 2019, **851**, 113480.

- 15 B. Chutia, N. Hussain, P. Puzari, D. Jampaiah, S. K. Bhargava, E. V. Matus, I. Z. Ismagilov, M. Kerzhentsev and P. Bharali, *Energy and Fuels*, 2021, **35**, 10756–10769.
- 16 X. Chen, F. Han, X. Chen, C. Zhang and W. Gou, *Catalysts*, 2022, **12**, 1122.
